# Supplementary material for: Factors Important to Older Adults Who Disagree With a Deprescribing Recommendation
Source: PubMed Central journal article supplement (PMC10568363; doi:10.1001/jamanetworkopen.2023.37281), 2023-10-11
Supplement: jamanetwopen-e2337281-s002.pdf [file jamanetwopen-e2337281-s002.pdf]

## Data Sharing Statement

Weir. Factors Important to Older Adults Who Disagree With a Deprescribing Recommendation. *JAMA Netw Open*. Published October 11, 2023. doi:10.1001/jamanetworkopen.2023.37281

### Data

**Data available:** Yes

**Data types:** Deidentified participant data

**How to access data:** The data that support the findings of this study are available upon request from the corresponding author. The data are not publicly available due to privacy or ethical restrictions.

**When available:** With publication

### Supporting Documents

**Document types:** None

### Additional Information

**Who can access the data:** Researchers whose proposed use of the data has been approved

**Types of analyses:** Specified purpose

**Mechanisms of data availability:** After approval of a proposal
